# Supplementary material for: Comparative in vitro cytotoxicity and binding investigation of artemisinin and its biogenetic precursors with ctDNA
Source: Royal Society of Chemistry journal article supplement (doi:10.1039/d0ra02042g), 2020-01-01
Supplement: d0ra02042g1.pdf [file d0ra02042g1.pdf]

**Supporting information**

**Comparative in vitro cytotoxicity and binding investigation of artemisinin and its biogenetic precursors with ctDNA**

Neha Maurya<sup>1</sup>, Khalid Imtiyaz Dar<sup>2</sup>, M Moshahid Alam Rizvi<sup>2</sup>, Khaled Mohamed Khedher<sup>3</sup>, Prashant Singh<sup>4</sup> and Rajan Patel<sup>1\*</sup>

<sup>1</sup>Biophysical Chemistry Laboratory, Centre for Interdisciplinary Research in Basic Sciences, Jamia Millia Islamia, New Delhi-110025, India.

<sup>2</sup>Department of Biosciences, Jamia Millia Islamia, New Delhi-110025, India.

<sup>3</sup>Department of Civil Engineering, College of Engineering, King Khalid University, ABHA, 6421, and Department of Civil Engineering, ISET, NABEUL, DGET, Tunisia.

<sup>4</sup>Department of Chemistry, ARSD College, University of Delhi, New Delhi- 110021, India.

\*Corresponding author.

Tel.: +91 8860634100; fax: +91 11 26983409.

Email address: [rpatel@jmi.ac.in](mailto:rpatel@jmi.ac.in) (Dr. R. Patel)

### Supplementary figures captions:

**Fig. S1** UV-Vis spectra of ctDNA (50  $\mu\text{M}$ ) in absence and in presence of ART (A), AA (B) and DHAA (C) at 298 K and pH 7.4.

**Fig. S2** Double reciprocal plot between  $1/A - A_0$  and  $1/C$  at low temperatures (298 and 308 K) for ART (A), AA (B) and DHAA (C).

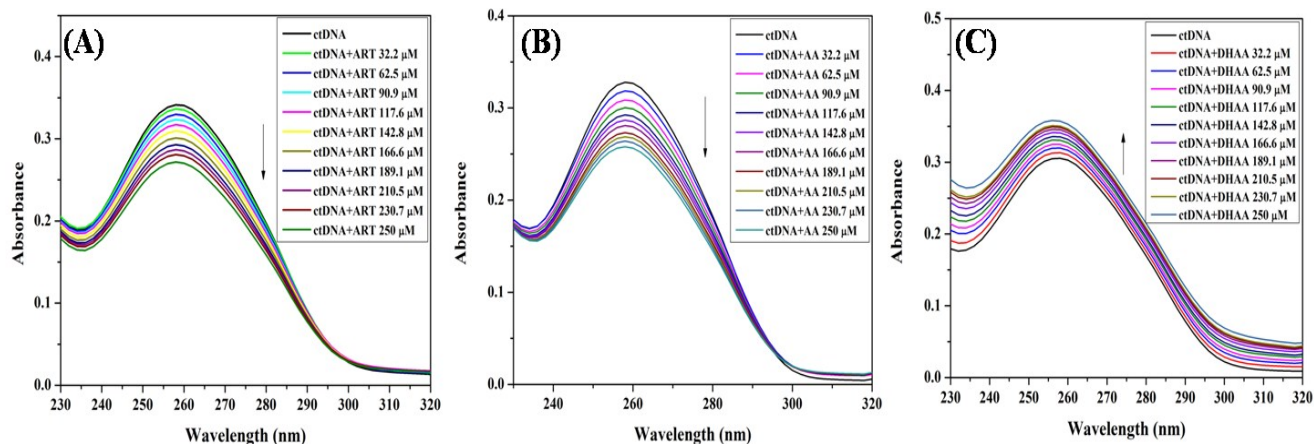

**Fig. S1** UV-Vis spectra of ctDNA (50  $\mu\text{M}$ ) in absence and in presence of ART (A), AA (B) and DHAA (C) at 298 K and pH 7.4.

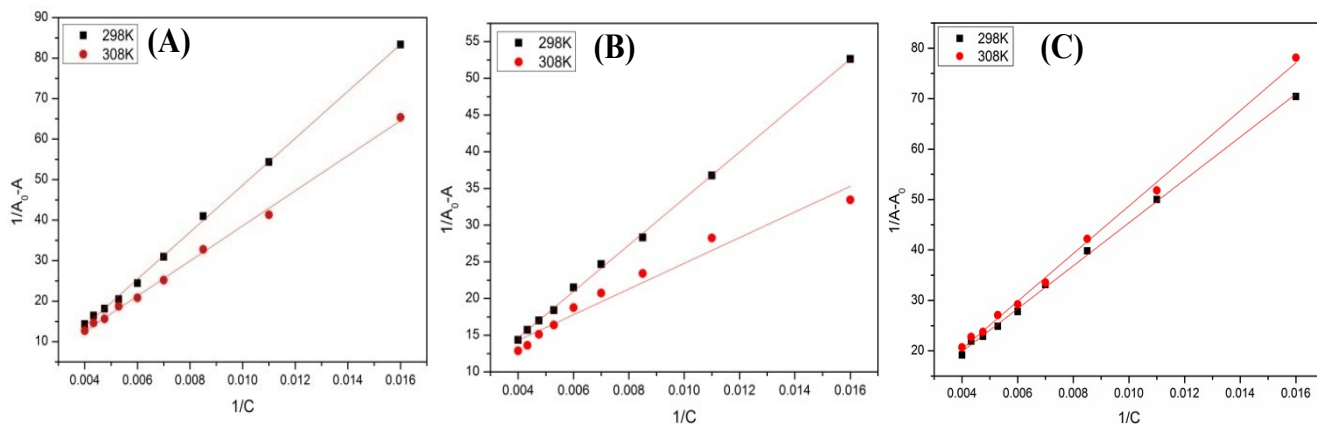

**Fig. S2** Double reciprocal plot between  $1/A - A_0$  and  $1/C$  at low temperatures (298 and 308 K) for ART (A), AA (B) and DHAA (C).
